# Supplementary material
Source: PubMed Central journal article supplement (PMC3436148)
Supplement: supp_M112.355545_jbc.M112.355545-1.pdf [file supp_M112.355545_jbc.M112.355545-1.pdf]

## SUPPLEMENTAL DATA

**Table 1. Primer sequences used for cloning experiments.**

| Cloning                  | Primers                              |                                     |
|--------------------------|--------------------------------------|-------------------------------------|
|                          | Forward                              | Reverse                             |
| <b>GFP NOD2</b>          | 5'-ATG-GGG-GAA-GAG-GGT-GGT -3'       | 5'-TCA-AAG-CAA-GAG-TCT-GGT-GTC-C-3' |
| <b>NOD2 V5</b>           | 5'-CAC-CAT-GGG-GGA-AGA-GGG-TGGT-3'   | 5'-AAG-CAA-GAG-TCT-GGT-GTC-CCT-3'   |
| <b>GFP NOD2 V5</b>       | 5'-CAC-CAT-GGC-CAG-CAA-AGG-AGA-AG-3' | 5'-TTT-GTA-GAG-CTC-ATC-CAT-GCC-3'   |
| <b>JNKBP-1 V5</b>        | 5'-CAC-CAT-GGC-TGT-GGA-AGG-GTC-A-3'  | 5'-GAG-TTG-CGT-TCC-ATA-CGC-3'       |
| <b>Delta N JNKBP1 V5</b> | 5'-ATG-CCC-AAC-CGG-CAC-CAG-3'        | 5'-GGT-GAA-GGG-TAC-TGG-ATC-CG-3'    |
| <b>Delta C JNKBP1 V5</b> | 5'-AAG-GGT-CAA-GAC-AAT-TCT-GCA-3'    | 5'-TCC-AGA-AGC-CCT-TTG-GGG-3'       |

**Table 2. Primer sequences used for qRT PCR.**

| qRT PCR       | Primers                              |                                  |
|---------------|--------------------------------------|----------------------------------|
|               | Forward                              | Reverse                          |
| <b>JNKBP1</b> | 5'-ACC-CCG-AGG-TGA-AGG-ATA-GTA-AC-3' | 5'-CAG-GCG-GAT-GGT-GTT-GTC-T-3'  |
| <b>HPRT1</b>  | 5'-TGA-CAC-TGG-CAA-AAC-AAT-GCA-3'    | 5'-GCT-TGC-GAC-CTT-GAC-CAT-CT-3' |
| <b>B2M</b>    | 5'-GAGTATGCCTGCCGTGT-3'              | 5'-AATCAAATGCGGCATCT-3'          |
| <b>IL-8</b>   | 5'-GAAGGAACCATCTCACTGTGTGTAA-3'      | 5'-ATCAGGAAGGCTGCCAAGAG-3'       |

**Table 3. SiRNA sequences .**

| JNKBP1 siRNA | sense                             | anti-sense                        |
|--------------|-----------------------------------|-----------------------------------|
| <b>#4</b>    | 5'-CGA-UCA-UAG-CAU-UUA-UGU-U55-3' | 5'-AAC-AUA-AAU-GCU-AUG-AUC-G55-3' |
| <b>#6</b>    | 5'-CGU-UUG-UAC-UGA-UGU-AUG-ATT-3' | 5'-UCA-UAC-AUC-AGU-ACA-AAC-GGG-3' |

**Figure S1**

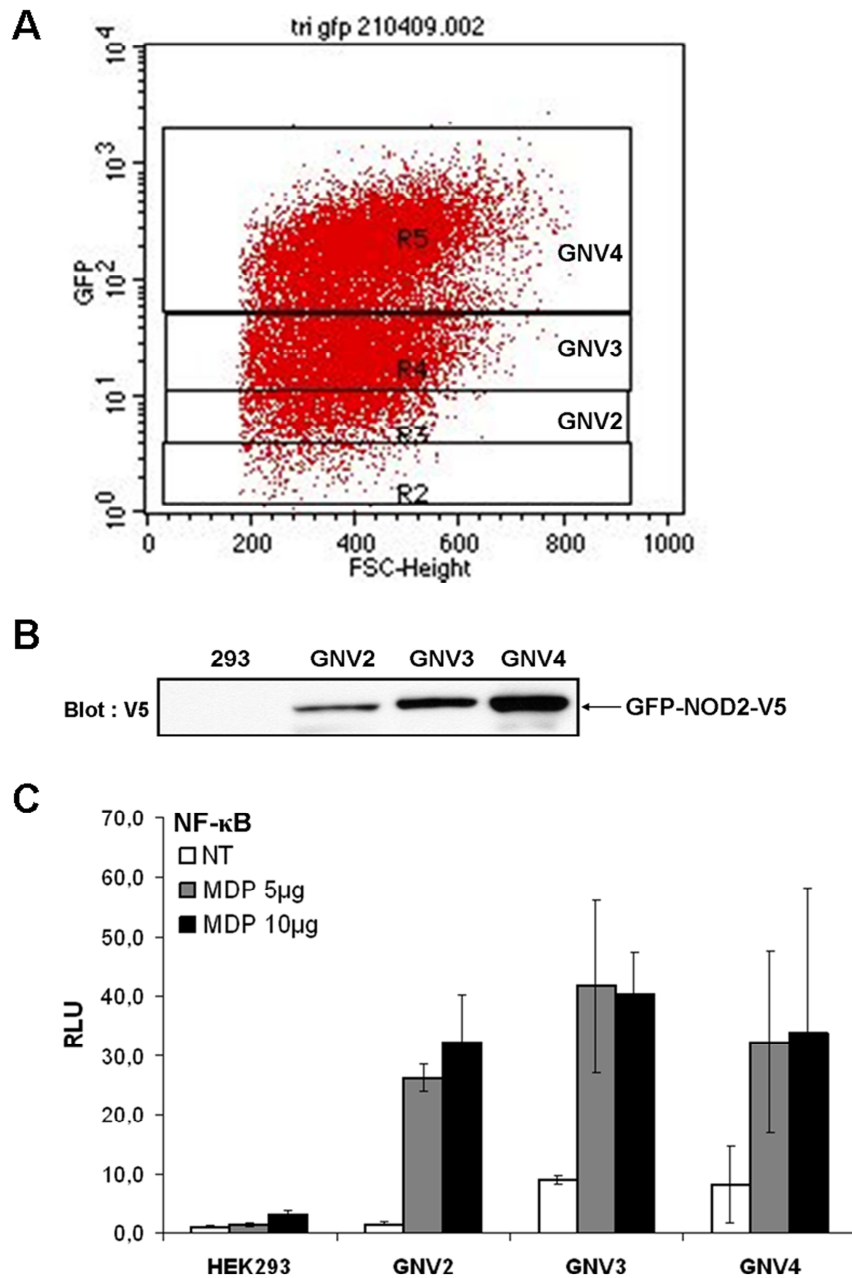

**Figure S1. Characterization of HEK293 GFP-NOD2-V5 (GNV) cells.**

**A.** GNV cells were sorted out according to their fluorescence by FACS into four cellular populations. **B.** Expression level of GFP-NOD2-V5 in the different GNV populations. Immunoblot with an anti-V5 antibody shows the GFP-NOD2-V5 expression level. **C.** Determination of MDP-induced NF- $\kappa$ B activation in the different GNV populations. GNV cells were transfected with the reporter plasmid ( $\kappa$ B)<sub>5</sub>-LUC. 24h post transfection, cells were stimulated for 8h with TNF (500U/mL) or MDP (5 $\mu$ g/mL or 10 $\mu$ g/mL). Cells were harvested for LUC assays. Values represent the means + S.D. of triplicate cultures.
